# Supplementary material
Source: publisher figshare collection journal article supplement (https://acs.figshare.com/ndownloader/files/6864189)
Supplement: Supplementary file 1 [file 6864189]

data_i14285
 
#----------------------------------------------------------------------------#
#                   CHEMICAL INFORMATION                                     #
#----------------------------------------------------------------------------#
 
_chemical_name_systematic
;
 ?
;
_chemical_formula_moiety                'C19 H19 N3 O5'
_chemical_formula_sum                   'C19 H19 N3 O5'
_chemical_formula_weight                369.37
_chemical_absolute_configuration        unk
 
#----------------------------------------------------------------------------#
#                   UNIT CELL INFORMATION                                    #
#----------------------------------------------------------------------------#
 
_symmetry_cell_setting                  Orthorhombic
_symmetry_space_group_name_H-M          P2(1)2(1)2(1)
_symmetry_space_group_name_Hall         '-P 2ac 2ab'
loop_
    _symmetry_equiv_pos_as_xyz
'x, y, z'
'-x+1/2, -y, z+1/2'
'-x, y+1/2, -z+1/2'
'x+1/2, -y+1/2, -z'
 
_cell_length_a                          6.8459(3)
_cell_length_b                          8.6718(3)
_cell_length_c                          29.3079(11)
_cell_angle_alpha                       90
_cell_angle_beta                        90
_cell_angle_gamma                       90
_cell_volume                            1739.90(12)
_cell_formula_units_Z                   4
_cell_measurement_temperature           100.00(10)
_cell_measurement_reflns_used           9966
_cell_measurement_theta_min             2.45
_cell_measurement_theta_max             27.19
 
#----------------------------------------------------------------------------#
#                   CRYSTAL INFORMATION                                      #
#----------------------------------------------------------------------------#
 
_exptl_crystal_description              prism
_exptl_crystal_colour                   colourless
_exptl_crystal_size_max                 0.3
_exptl_crystal_size_mid                 0.28
_exptl_crystal_size_min                 0.14
_exptl_crystal_density_meas             'not measured'
_exptl_crystal_density_diffrn           1.41
_exptl_crystal_density_method           'not measured'
_exptl_crystal_F_000                    776
_exptl_special_details
;
 ?
;
 
#----------------------------------------------------------------------------#
#                   ABSORPTION CORRECTION                                    #
#----------------------------------------------------------------------------#
 
_exptl_absorpt_coefficient_mu           0.104
_exptl_absorpt_correction_type          multi-scan
_exptl_absorpt_process_details          'Bruker SADABS, 1996'
_exptl_absorpt_correction_T_min         0.9695
_exptl_absorpt_correction_T_max         0.9856
 
#----------------------------------------------------------------------------#
#                   DATA COLLECTION                                          #
#----------------------------------------------------------------------------#
 
_diffrn_ambient_temperature             100.00(10)
_diffrn_radiation_wavelength            0.71073
_diffrn_radiation_type                  MoK\a
_diffrn_radiation_monochromator         graphite
_diffrn_measurement_device_type         'CCD area detector'
_diffrn_measurement_method              'phi and omega scans'
_diffrn_reflns_av_R_equivalents         0.0232
_diffrn_reflns_av_unetI/netI            0.0294
_diffrn_reflns_number                   15946
_diffrn_reflns_limit_h_min              -3
_diffrn_reflns_limit_h_max              8
_diffrn_reflns_limit_k_min              -9
_diffrn_reflns_limit_k_max              11
_diffrn_reflns_limit_l_min              -27
_diffrn_reflns_limit_l_max              37
_diffrn_reflns_theta_min                1.39
_diffrn_reflns_theta_max                27.1
_diffrn_reflns_theta_full               25
_diffrn_measured_fraction_theta_full
                                        0.999
_diffrn_measured_fraction_theta_max
                                        0.998
_reflns_number_total                    3821
_reflns_number_gt                       3352
_reflns_threshold_expression            >2sigma(I)
 
#----------------------------------------------------------------------------#
#                   COMPUTER PROGRAMS USED                                   #
#----------------------------------------------------------------------------#
 
_computing_data_collection              'Bruker APEX2'
_computing_cell_refinement              'Bruker APEX2'
_computing_data_reduction               'Bruker SAINT'
_computing_structure_solution           'SHELXS-97 (Sheldrick, 1997)'
_computing_structure_refinement         'SHELXL-97 (Sheldrick, 1997)'
_computing_molecular_graphics           'Ortep-3 for Windows (Farrugia, 1997)'
_computing_publication_material
                                   'WinGX publication routines (Farrugia, 1999)'
 
#----------------------------------------------------------------------------#
#                   STRUCTURE SOLUTION
#----------------------------------------------------------------------------#
 
_atom_sites_solution_primary            direct
_atom_sites_solution_secondary          difmap
_atom_sites_solution_hydrogens          geom
 
#----------------------------------------------------------------------------#
#                   REFINEMENT INFORMATION                                   #
#----------------------------------------------------------------------------#
 
_refine_special_details
;
 Refinement of F^2^ against ALL reflections.  The weighted R-factor wR and
 goodness of fit S are based on F^2^, conventional R-factors R are based
 on F, with F set to zero for negative F^2^. The threshold expression of
 F^2^ > 2sigma(F^2^) is used only for calculating R-factors(gt) etc. and is
 not relevant to the choice of reflections for refinement.  R-factors based
 on F^2^ are statistically about twice as large as those based on F, and R-
 factors based on ALL data will be even larger.
;
_refine_ls_structure_factor_coef        Fsqd
_refine_ls_matrix_type                  full
_refine_ls_weighting_scheme             calc
_refine_ls_weighting_details
         'calc w=1/[\s^2^(Fo^2^)+(0.0307P)^2^+0.3736P] where P=(Fo^2^+2Fc^2^)/3'
_refine_ls_hydrogen_treatment           constr
_refine_ls_extinction_method            SHELXL
_refine_ls_extinction_expression
                                    Fc^*^=kFc[1+0.001xFc^2^\l^3^/sin(2\q)]^-1/4^
_refine_ls_extinction_coef              0.0045(9)
_refine_ls_number_reflns                3821
_refine_ls_number_parameters            246
_refine_ls_number_restraints            0
_refine_ls_R_factor_all                 0.0421
_refine_ls_R_factor_gt                  0.0339
_refine_ls_wR_factor_ref                0.0751
_refine_ls_wR_factor_gt                 0.0709
_refine_ls_goodness_of_fit_ref          1.043
_refine_ls_restrained_S_all             1.043
_refine_ls_shift/su_max                 0.001
_refine_ls_shift/su_mean                0
_refine_ls_abs_structure_details
                                    'Flack H D (1983), Acta Cryst. A39, 876-881'
_refine_ls_abs_structure_Flack          0.1(8)
_refine_diff_density_max                0.199
_refine_diff_density_min                -0.162
_refine_diff_density_rms                0.037
 
#----------------------------------------------------------------------------#
#                   ATOMIC TYPES, COORDINATES AND THERMAL PARAMETERS         #
#----------------------------------------------------------------------------#
 
loop_
    _atom_type_symbol
    _atom_type_description
    _atom_type_scat_dispersion_real
    _atom_type_scat_dispersion_imag
    _atom_type_scat_source
O O 0.0106 0.006 'International Tables Vol C Tables 4.2.6.8 and 6.1.1.4'
N N 0.0061 0.0033 'International Tables Vol C Tables 4.2.6.8 and 6.1.1.4'
C C 0.0033 0.0016 'International Tables Vol C Tables 4.2.6.8 and 6.1.1.4'
H H 0 0 'International Tables Vol C Tables 4.2.6.8 and 6.1.1.4'
 
loop_
    _atom_site_label
    _atom_site_type_symbol
    _atom_site_fract_x
    _atom_site_fract_y
    _atom_site_fract_z
    _atom_site_U_iso_or_equiv
    _atom_site_adp_type
    _atom_site_occupancy
    _atom_site_symmetry_multiplicity
    _atom_site_calc_flag
    _atom_site_refinement_flags
    _atom_site_disorder_assembly
    _atom_site_disorder_group
O1 O 0.82392(15) 0.52232(13) 0.90009(4) 0.0261(3) Uani 1 1 d . . .
O3 O 0.70149(15) 0.93745(13) 0.92963(4) 0.0263(3) Uani 1 1 d . . .
O4 O 0.54355(13) 0.68264(13) 0.84308(3) 0.0224(3) Uani 1 1 d . . .
O6 O 0.98237(14) 0.68048(14) 0.94885(4) 0.0276(3) Uani 1 1 d . . .
O7 O 0.41519(17) 1.03042(15) 0.95511(4) 0.0370(3) Uani 1 1 d . . .
N1 N 0.45879(19) 0.57132(19) 0.95394(5) 0.0342(4) Uani 1 1 d . . .
N2 N 0.43758(19) 0.47364(19) 0.92362(5) 0.0324(4) Uani 1 1 d . . .
N3 N 0.3952(2) 0.3767(2) 0.89952(6) 0.0449(5) Uani 1 1 d . . .
C1 C 0.8177(2) 0.5834(2) 0.94474(6) 0.0255(4) Uani 1 1 d . . .
H1 H 0.8246 0.4982 0.9677 0.031 Uiso 1 1 calc R . .
C2 C 0.6293(2) 0.6753(2) 0.95102(6) 0.0239(4) Uani 1 1 d . . .
H2 H 0.6395 0.7302 0.9809 0.029 Uiso 1 1 calc R . .
C3 C 0.60515(19) 0.79936(19) 0.91380(5) 0.0214(3) Uani 1 1 d . . .
H3 H 0.463 0.8213 0.9094 0.026 Uiso 1 1 calc R . .
C4 C 0.69597(19) 0.75790(19) 0.86782(5) 0.0210(3) Uani 1 1 d . . .
H4 H 0.734 0.8546 0.8515 0.025 Uiso 1 1 calc R . .
C5 C 0.87555(19) 0.6560(2) 0.87369(6) 0.0244(4) Uani 1 1 d . . .
H5 H 0.9304 0.6254 0.8434 0.029 Uiso 1 1 calc R . .
C6 C 1.0324(2) 0.7297(2) 0.90359(5) 0.0274(4) Uani 1 1 d . . .
H6A H 1.1642 0.6929 0.8949 0.033 Uiso 1 1 calc R . .
H6B H 1.0289 0.8436 0.9011 0.033 Uiso 1 1 calc R . .
C7 C 0.5893(2) 1.0422(2) 0.95153(6) 0.0262(4) Uani 1 1 d . . .
C8 C 0.7112(3) 1.1695(2) 0.96972(7) 0.0357(4) Uani 1 1 d . . .
H8A H 0.8256 1.1265 0.9853 0.054 Uiso 1 1 calc R . .
H8B H 0.6344 1.2307 0.9914 0.054 Uiso 1 1 calc R . .
H8C H 0.7543 1.2355 0.9445 0.054 Uiso 1 1 calc R . .
C9 C 0.5960(2) 0.6408(2) 0.79753(5) 0.0284(4) Uani 1 1 d . . .
H9A H 0.6825 0.5493 0.798 0.034 Uiso 1 1 calc R . .
H9B H 0.6671 0.7267 0.7827 0.034 Uiso 1 1 calc R . .
C10 C 0.4126(2) 0.6051(2) 0.77130(5) 0.0233(4) Uani 1 1 d . . .
C11 C 0.3797(2) 0.6665(2) 0.72934(5) 0.0238(4) Uani 1 1 d . . .
H11 H 0.4747 0.7335 0.7165 0.029 Uiso 1 1 calc R . .
C12 C 0.1668(2) 0.7017(2) 0.66165(5) 0.0278(4) Uani 1 1 d . . .
H12 H 0.2611 0.7673 0.6479 0.033 Uiso 1 1 calc R . .
C13 C -0.0069(2) 0.6746(2) 0.64003(6) 0.0329(4) Uani 1 1 d . . .
H13 H -0.0339 0.7238 0.6118 0.04 Uiso 1 1 calc R . .
C14 C -0.1457(2) 0.5745(2) 0.65933(6) 0.0329(4) Uani 1 1 d . . .
H14 H -0.2653 0.556 0.6438 0.039 Uiso 1 1 calc R . .
C15 C -0.1107(2) 0.5041(2) 0.69985(6) 0.0302(4) Uani 1 1 d . . .
H15 H -0.2049 0.4353 0.7122 0.036 Uiso 1 1 calc R . .
C16 C 0.1060(2) 0.4674(2) 0.76711(5) 0.0256(4) Uani 1 1 d . . .
H16 H 0.0149 0.3975 0.7802 0.031 Uiso 1 1 calc R . .
C17 C 0.2727(2) 0.5030(2) 0.79030(6) 0.0244(4) Uani 1 1 d . . .
H17 H 0.2954 0.4589 0.8195 0.029 Uiso 1 1 calc R . .
C18 C 0.2068(2) 0.63324(18) 0.70413(5) 0.0216(3) Uani 1 1 d . . .
C19 C 0.0666(2) 0.5326(2) 0.72399(5) 0.0225(3) Uani 1 1 d . . .
 
loop_
    _atom_site_aniso_label
    _atom_site_aniso_U_11
    _atom_site_aniso_U_22
    _atom_site_aniso_U_33
    _atom_site_aniso_U_23
    _atom_site_aniso_U_13
    _atom_site_aniso_U_12
O1 0.0248(5) 0.0228(6) 0.0307(6) -0.0053(5) -0.0072(5) 0.0018(5)
O3 0.0240(5) 0.0217(6) 0.0334(7) -0.0079(5) 0.0000(5) -0.0009(5)
O4 0.0171(4) 0.0315(7) 0.0185(6) -0.0011(5) -0.0013(4) -0.0028(4)
O6 0.0232(5) 0.0325(7) 0.0272(6) -0.0019(5) -0.0075(4) -0.0058(5)
O7 0.0366(6) 0.0315(7) 0.0429(8) 0.0001(6) 0.0131(6) 0.0067(6)
N1 0.0276(7) 0.0419(10) 0.0331(9) 0.0056(8) 0.0017(6) -0.0132(7)
N2 0.0268(6) 0.0374(9) 0.0329(9) 0.0159(8) -0.0103(6) -0.0146(7)
N3 0.0485(9) 0.0421(11) 0.0440(10) 0.0133(9) -0.0205(8) -0.0253(8)
C1 0.0257(7) 0.0233(9) 0.0276(9) 0.0008(7) -0.0094(6) -0.0043(7)
C2 0.0223(6) 0.0283(10) 0.0212(8) -0.0007(7) -0.0011(6) -0.0065(7)
C3 0.0180(6) 0.0219(9) 0.0243(9) -0.0037(7) 0.0007(6) -0.0014(6)
C4 0.0170(6) 0.0250(9) 0.0211(8) -0.0003(7) -0.0012(6) -0.0034(6)
C5 0.0170(6) 0.0316(10) 0.0248(9) -0.0049(8) 0.0010(6) -0.0005(6)
C6 0.0179(6) 0.0353(10) 0.0290(9) -0.0032(8) -0.0018(6) -0.0023(7)
C7 0.0387(8) 0.0210(9) 0.0188(8) 0.0044(7) 0.0015(7) 0.0046(7)
C8 0.0508(10) 0.0235(10) 0.0329(10) -0.0027(8) -0.0072(8) 0.0069(9)
C9 0.0202(6) 0.0455(11) 0.0195(9) -0.0030(8) 0.0001(6) -0.0023(7)
C10 0.0206(6) 0.0277(9) 0.0216(9) -0.0031(7) -0.0009(6) 0.0023(6)
C11 0.0235(7) 0.0248(9) 0.0231(9) -0.0014(7) 0.0025(6) -0.0005(7)
C12 0.0314(7) 0.0293(10) 0.0228(9) 0.0004(8) 0.0024(7) 0.0054(7)
C13 0.0353(8) 0.0405(12) 0.0230(9) -0.0007(8) -0.0019(7) 0.0165(9)
C14 0.0246(7) 0.0492(12) 0.0249(9) -0.0115(9) -0.0071(7) 0.0089(7)
C15 0.0223(7) 0.0406(11) 0.0277(9) -0.0102(8) -0.0003(7) 0.0006(7)
C16 0.0261(7) 0.0275(9) 0.0231(9) -0.0006(8) 0.0042(7) -0.0033(7)
C17 0.0249(7) 0.0281(9) 0.0203(8) 0.0012(7) -0.0001(6) 0.0024(7)
C18 0.0245(7) 0.0211(8) 0.0192(8) -0.0022(7) 0.0021(6) 0.0043(6)
C19 0.0220(7) 0.0243(9) 0.0211(8) -0.0044(7) 0.0007(6) 0.0033(7)
 
 
#----------------------------------------------------------------------------#
#                   MOLECULAR GEOMETRY                                       #
#----------------------------------------------------------------------------#
 
_geom_special_details
;
 All esds (except the esd in the dihedral angle between two l.s. planes)
 are estimated using the full covariance matrix.  The cell esds are taken
 into account individually in the estimation of esds in distances, angles
 and torsion angles; correlations between esds in cell parameters are only
 used when they are defined by crystal symmetry.  An approximate (isotropic)
 treatment of cell esds is used for estimating esds involving l.s. planes.
;
loop_
    _geom_bond_atom_site_label_1
    _geom_bond_atom_site_label_2
    _geom_bond_distance
    _geom_bond_site_symmetry_2
    _geom_bond_publ_flag
O1 C1 1.4123(19) . ?
O1 C5 1.438(2) . ?
O3 C7 1.351(2) . ?
O3 C3 1.4437(19) . ?
O4 C4 1.4286(17) . ?
O4 C9 1.4293(18) . ?
O6 C1 1.4125(19) . ?
O6 C6 1.4351(19) . ?
O7 C7 1.201(2) . ?
N1 N2 1.236(2) . ?
N1 C2 1.477(2) . ?
N2 N3 1.136(2) . ?
C1 C2 1.527(2) . ?
C1 H1 1 . ?
C2 C3 1.541(2) . ?
C2 H2 1 . ?
C3 C4 1.527(2) . ?
C3 H3 1 . ?
C4 C5 1.524(2) . ?
C4 H4 1 . ?
C5 C6 1.527(2) . ?
C5 H5 1 . ?
C6 H6A 0.99 . ?
C6 H6B 0.99 . ?
C7 C8 1.483(2) . ?
C8 H8A 0.98 . ?
C8 H8B 0.98 . ?
C8 H8C 0.98 . ?
C9 C10 1.504(2) . ?
C9 H9A 0.99 . ?
C9 H9B 0.99 . ?
C10 C11 1.359(2) . ?
C10 C17 1.418(2) . ?
C11 C18 1.425(2) . ?
C11 H11 0.95 . ?
C12 C13 1.368(2) . ?
C12 C18 1.406(2) . ?
C12 H12 0.95 . ?
C13 C14 1.406(3) . ?
C13 H13 0.95 . ?
C14 C15 1.357(2) . ?
C14 H14 0.95 . ?
C15 C19 1.427(2) . ?
C15 H15 0.95 . ?
C16 C17 1.364(2) . ?
C16 C19 1.411(2) . ?
C16 H16 0.95 . ?
C17 H17 0.95 . ?
C18 C19 1.422(2) . ?
 
loop_
    _geom_angle_atom_site_label_1
    _geom_angle_atom_site_label_2
    _geom_angle_atom_site_label_3
    _geom_angle
    _geom_angle_site_symmetry_1
    _geom_angle_site_symmetry_3
    _geom_angle_publ_flag
C1 O1 C5 101.77(12) . . ?
C7 O3 C3 116.77(12) . . ?
C4 O4 C9 114.00(11) . . ?
C1 O6 C6 106.83(11) . . ?
N2 N1 C2 117.99(13) . . ?
N3 N2 N1 169.83(17) . . ?
O1 C1 O6 106.15(13) . . ?
O1 C1 C2 109.44(12) . . ?
O6 C1 C2 110.65(13) . . ?
O1 C1 H1 110.2 . . ?
O6 C1 H1 110.2 . . ?
C2 C1 H1 110.2 . . ?
N1 C2 C1 110.83(13) . . ?
N1 C2 C3 112.47(12) . . ?
C1 C2 C3 111.71(13) . . ?
N1 C2 H2 107.2 . . ?
C1 C2 H2 107.2 . . ?
C3 C2 H2 107.2 . . ?
O3 C3 C4 107.03(12) . . ?
O3 C3 C2 107.62(12) . . ?
C4 C3 C2 114.62(13) . . ?
O3 C3 H3 109.1 . . ?
C4 C3 H3 109.1 . . ?
C2 C3 H3 109.1 . . ?
O4 C4 C5 112.43(13) . . ?
O4 C4 C3 104.96(11) . . ?
C5 C4 C3 111.44(13) . . ?
O4 C4 H4 109.3 . . ?
C5 C4 H4 109.3 . . ?
C3 C4 H4 109.3 . . ?
O1 C5 C4 109.27(11) . . ?
O1 C5 C6 101.64(13) . . ?
C4 C5 C6 112.92(13) . . ?
O1 C5 H5 110.9 . . ?
C4 C5 H5 110.9 . . ?
C6 C5 H5 110.9 . . ?
O6 C6 C5 103.76(12) . . ?
O6 C6 H6A 111 . . ?
C5 C6 H6A 111 . . ?
O6 C6 H6B 111 . . ?
C5 C6 H6B 111 . . ?
H6A C6 H6B 109 . . ?
O7 C7 O3 123.25(17) . . ?
O7 C7 C8 126.19(17) . . ?
O3 C7 C8 110.56(14) . . ?
C7 C8 H8A 109.5 . . ?
C7 C8 H8B 109.5 . . ?
H8A C8 H8B 109.5 . . ?
C7 C8 H8C 109.5 . . ?
H8A C8 H8C 109.5 . . ?
H8B C8 H8C 109.5 . . ?
O4 C9 C10 108.64(11) . . ?
O4 C9 H9A 110 . . ?
C10 C9 H9A 110 . . ?
O4 C9 H9B 110 . . ?
C10 C9 H9B 110 . . ?
H9A C9 H9B 108.3 . . ?
C11 C10 C17 119.24(14) . . ?
C11 C10 C9 121.32(14) . . ?
C17 C10 C9 119.43(14) . . ?
C10 C11 C18 121.82(14) . . ?
C10 C11 H11 119.1 . . ?
C18 C11 H11 119.1 . . ?
C13 C12 C18 120.45(16) . . ?
C13 C12 H12 119.8 . . ?
C18 C12 H12 119.8 . . ?
C12 C13 C14 120.50(16) . . ?
C12 C13 H13 119.7 . . ?
C14 C13 H13 119.7 . . ?
C15 C14 C13 120.73(15) . . ?
C15 C14 H14 119.6 . . ?
C13 C14 H14 119.6 . . ?
C14 C15 C19 120.38(16) . . ?
C14 C15 H15 119.8 . . ?
C19 C15 H15 119.8 . . ?
C17 C16 C19 121.03(15) . . ?
C17 C16 H16 119.5 . . ?
C19 C16 H16 119.5 . . ?
C16 C17 C10 120.71(15) . . ?
C16 C17 H17 119.6 . . ?
C10 C17 H17 119.6 . . ?
C12 C18 C19 119.33(14) . . ?
C12 C18 C11 122.37(15) . . ?
C19 C18 C11 118.23(14) . . ?
C16 C19 C18 118.93(13) . . ?
C16 C19 C15 122.49(15) . . ?
C18 C19 C15 118.57(15) . . ?
 
loop_
    _geom_torsion_atom_site_label_1
    _geom_torsion_atom_site_label_2
    _geom_torsion_atom_site_label_3
    _geom_torsion_atom_site_label_4
    _geom_torsion
    _geom_torsion_site_symmetry_1
    _geom_torsion_site_symmetry_2
    _geom_torsion_site_symmetry_3
    _geom_torsion_site_symmetry_4
    _geom_torsion_publ_flag
C2 N1 N2 N3 175.8(9) . . . . ?
C5 O1 C1 O6 -42.99(13) . . . . ?
C5 O1 C1 C2 76.44(14) . . . . ?
C6 O6 C1 O1 25.09(15) . . . . ?
C6 O6 C1 C2 -93.55(15) . . . . ?
N2 N1 C2 C1 -51.66(19) . . . . ?
N2 N1 C2 C3 74.19(19) . . . . ?
O1 C1 C2 N1 72.20(17) . . . . ?
O6 C1 C2 N1 -171.18(13) . . . . ?
O1 C1 C2 C3 -54.08(17) . . . . ?
O6 C1 C2 C3 62.55(17) . . . . ?
C7 O3 C3 C4 142.44(13) . . . . ?
C7 O3 C3 C2 -93.89(14) . . . . ?
N1 C2 C3 O3 146.31(12) . . . . ?
C1 C2 C3 O3 -88.31(15) . . . . ?
N1 C2 C3 C4 -94.77(15) . . . . ?
C1 C2 C3 C4 30.60(17) . . . . ?
C9 O4 C4 C5 -61.73(17) . . . . ?
C9 O4 C4 C3 176.96(13) . . . . ?
O3 C3 C4 O4 -150.03(12) . . . . ?
C2 C3 C4 O4 90.73(14) . . . . ?
O3 C3 C4 C5 88.01(14) . . . . ?
C2 C3 C4 C5 -31.23(17) . . . . ?
C1 O1 C5 C4 -77.21(14) . . . . ?
C1 O1 C5 C6 42.34(13) . . . . ?
O4 C4 C5 O1 -62.67(16) . . . . ?
C3 C4 C5 O1 54.86(16) . . . . ?
O4 C4 C5 C6 -175.00(13) . . . . ?
C3 C4 C5 C6 -57.47(17) . . . . ?
C1 O6 C6 C5 2.05(16) . . . . ?
O1 C5 C6 O6 -27.46(15) . . . . ?
C4 C5 C6 O6 89.46(16) . . . . ?
C3 O3 C7 O7 -5.7(2) . . . . ?
C3 O3 C7 C8 174.34(13) . . . . ?
C4 O4 C9 C10 -164.21(13) . . . . ?
O4 C9 C10 C11 131.65(16) . . . . ?
O4 C9 C10 C17 -49.6(2) . . . . ?
C17 C10 C11 C18 1.1(2) . . . . ?
C9 C10 C11 C18 179.81(15) . . . . ?
C18 C12 C13 C14 -1.8(2) . . . . ?
C12 C13 C14 C15 0.5(3) . . . . ?
C13 C14 C15 C19 1.1(3) . . . . ?
C19 C16 C17 C10 -0.9(2) . . . . ?
C11 C10 C17 C16 -0.6(2) . . . . ?
C9 C10 C17 C16 -179.36(15) . . . . ?
C13 C12 C18 C19 1.4(2) . . . . ?
C13 C12 C18 C11 -175.54(16) . . . . ?
C10 C11 C18 C12 176.91(16) . . . . ?
C10 C11 C18 C19 0.0(2) . . . . ?
C17 C16 C19 C18 2.0(2) . . . . ?
C17 C16 C19 C15 -176.74(16) . . . . ?
C12 C18 C19 C16 -178.50(15) . . . . ?
C11 C18 C19 C16 -1.5(2) . . . . ?
C12 C18 C19 C15 0.2(2) . . . . ?
C11 C18 C19 C15 177.29(14) . . . . ?
C14 C15 C19 C16 177.22(16) . . . . ?
C14 C15 C19 C18 -1.5(2) . . . . ?
 
# The following lines are used to test the character set of files sent by
# network email or other means. They are not part of the CIF data set
# abcdefghijklmnopqrstuvwxyzABCDEFGHIJKLMNOPQRSTUVWXYZ0123456789
# !@#$%^&*()_+{}:"~<>?|\-=[];'`,./
 
# END of CIF
